# Supplementary material for: Engineering a dual-action nitric oxide and propolis releasing polymeric matrix for extended antimicrobial efficacy
Source: Royal Society of Chemistry journal article supplement (doi:10.1039/d6tb00666c), 2026-04-30
Supplement: d6tb00666c1.pdf [file d6tb00666c1.pdf]

### Supporting Information (SI)

#### **Engineering dual-action nitric oxide and propolis releasing polymeric matrix for extended antimicrobial efficacy**

Aasma Sapkota<sup>a</sup>, Sadah Schell<sup>a</sup>, Mofoluwasade O Popoola<sup>a</sup>, Hitesh Handa<sup>ab</sup> and Elizabeth J. Brisbois<sup>a\*</sup>

<sup>a</sup>School of Chemical, Materials, & Biomedical Engineering, University of Georgia, Athens 30602, United States

<sup>b</sup>Pharmaceutical and Biomedical Sciences Department, College of Pharmacy, University of Georgia, Athens, GA 30602, United States

\*Corresponding Author e-mail: [ejbrisbois@uga.edu](mailto:ejbrisbois@uga.edu)

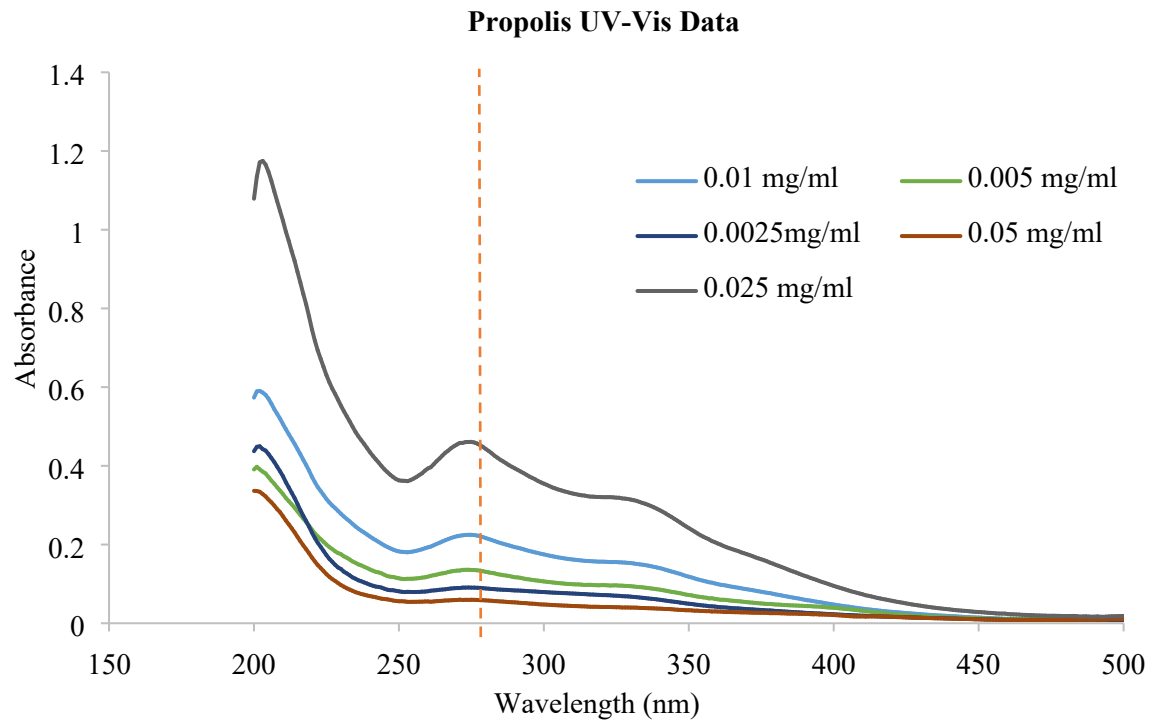

**Figure S1:** UV-vis spectrum for different concentrations of propolis with propolis peak at 275 nm highlighted by orange dashed line.

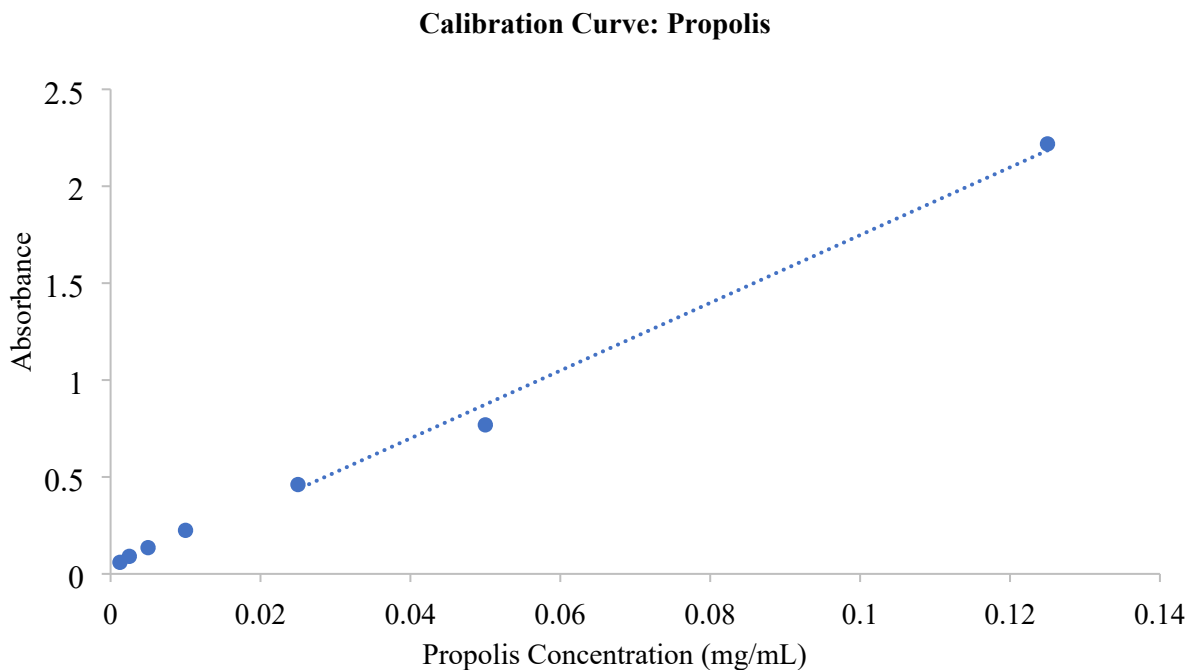

**Figure S2:** Calibration curve for propolis leaching at 275nm.

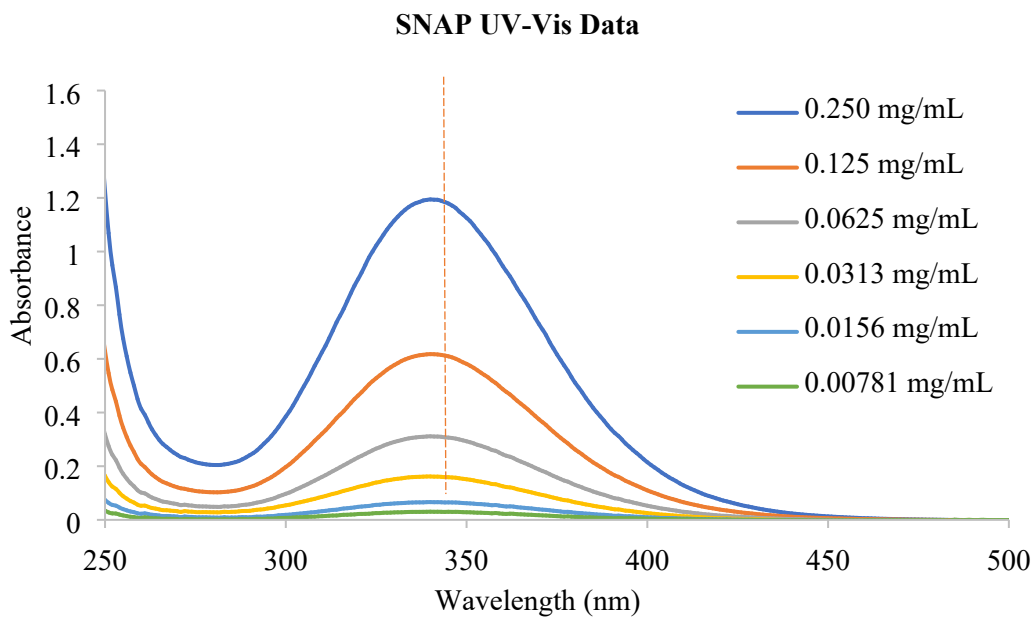

**Figure S3:** UV-vis spectrum for different concentrations of SNAP with SNAP peak at 340 nm highlighted by orange dashed line.

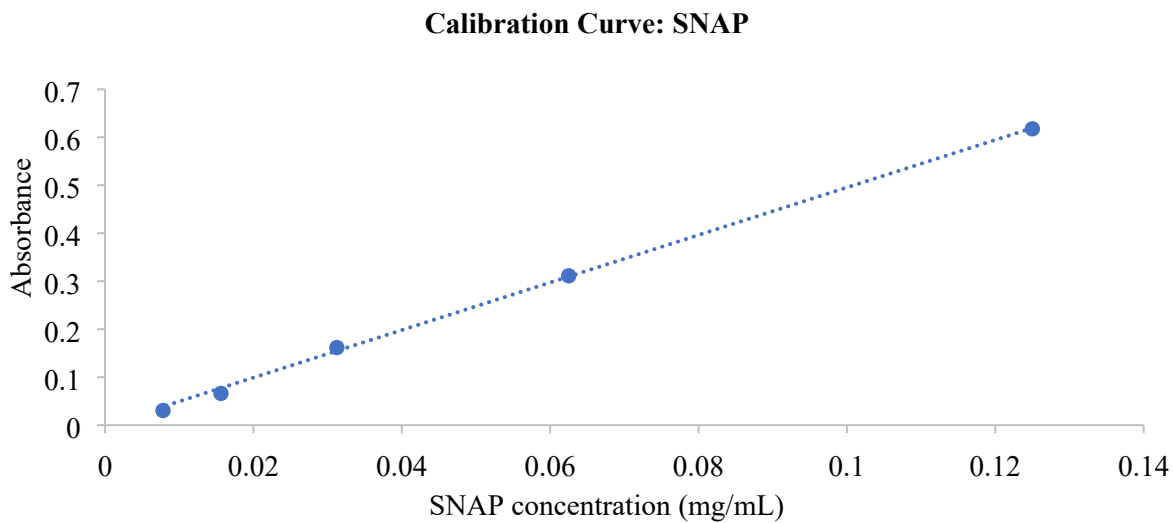

**Figure S4:** Calibration curve for SNAP leaching at 340 nm.

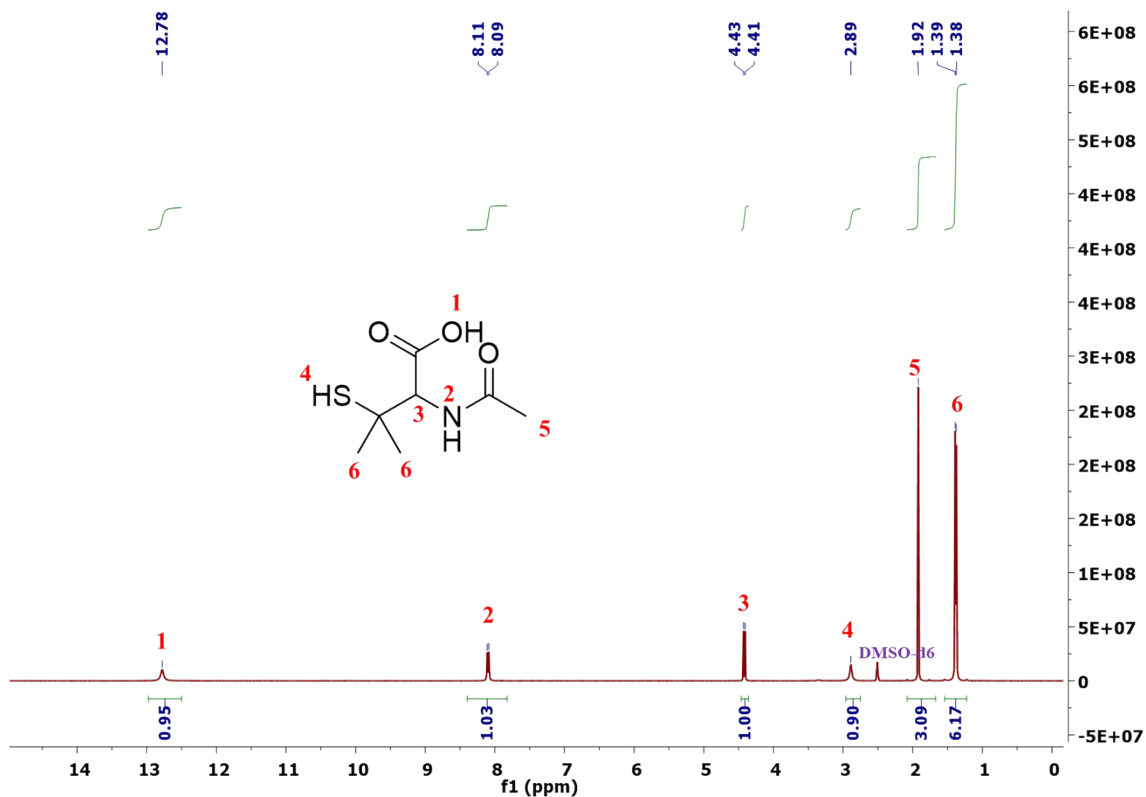

**Figure S5:** <sup>1</sup>H NMR spectrum of NAP in DMSO-d<sub>6</sub>.

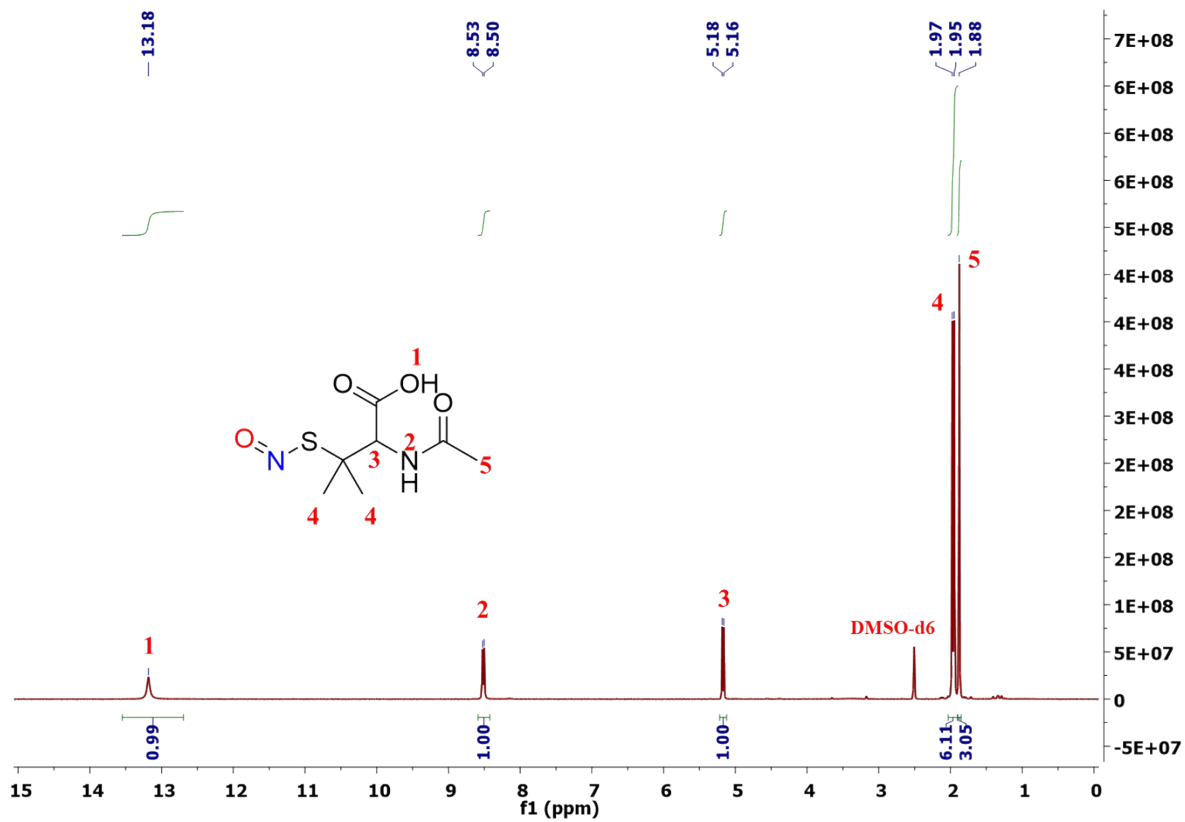

**Figure S6:**  $^1\text{H}$  NMR spectrum of SNAP in DMSO- $d_6$ .

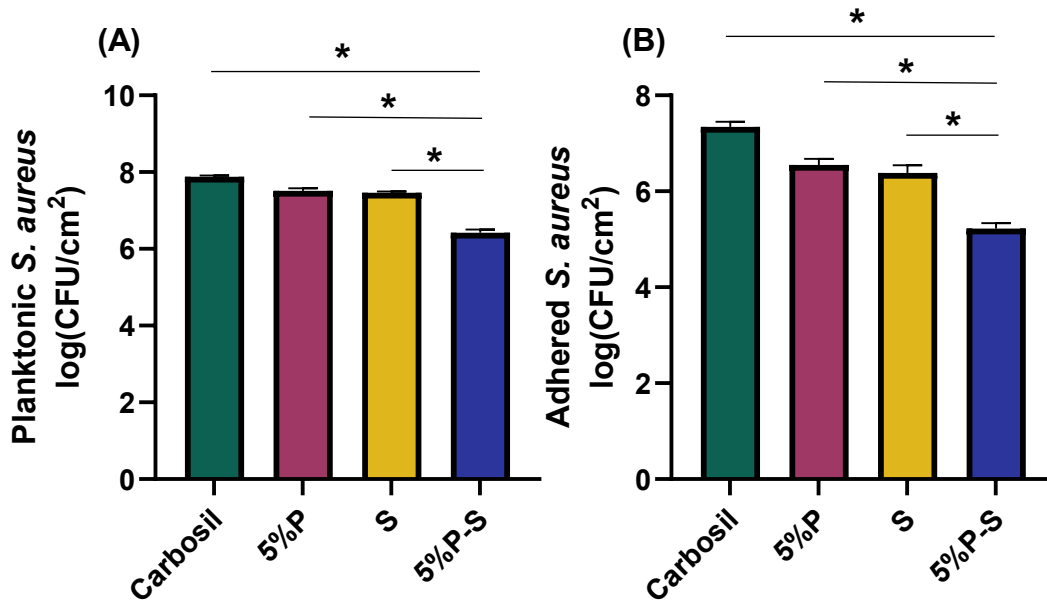

**Figure S7:** Reduction in viability of (A) planktonic and (B) adhered *S. aureus* with 5%P-S samples after incubation in physiological conditions for 7 d. \*represents  $p \leq 0.05$ . All data are represented as mean  $\pm$  SD ( $n \geq 4$ ).

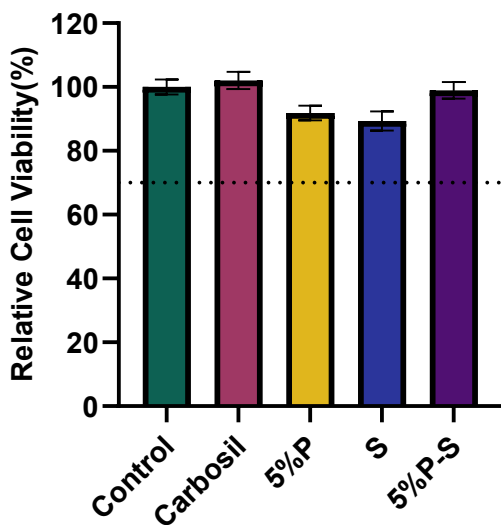

**Figure S8:** Cytocompatibility of the fabricated films as evaluated against 3T3 mouse fibroblast cells through an indirect-contact MTT assay. All data are represented as mean  $\pm$  SD ( $n \geq 4$ ).

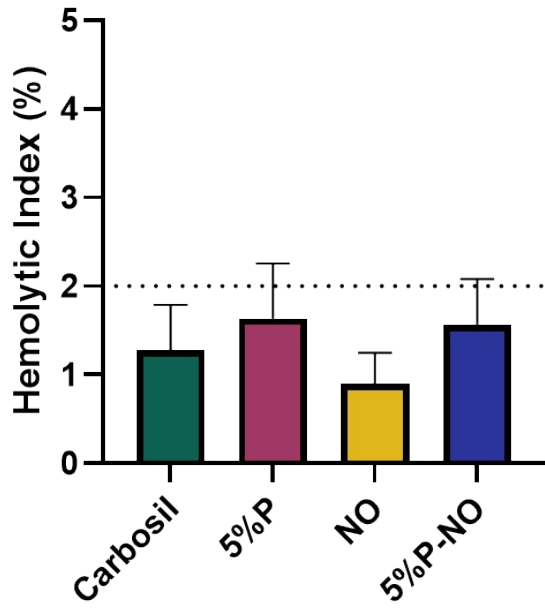

**Figure S9:** Percentage hemolysis observed with different sample types when tested against porcine blood.
